# Supplementary material for: Genome sequence analysis of Malayan pangolin (Manis javanica) forensic samples reveals the presence of Paraburkholderia fungorum sequences
Source: PeerJ. 2023 Oct 4;11:e16002. doi: 10.7717/peerj.16002 (PMC10559893; doi:10.7717/peerj.16002)
Supplement: Supplemental Information 1 — Three sets of in-house designed primers and one set of universal 16S RNA primers were used for screening. [file peerj-11-16002-s001.xlsx]

## Sheet: Table 1
Gene	Target Gene	Primers	Estimated PCR Length (bp)	Annealing Temperature
Target A	Transposase genomic region	5'- CATCTTCGCCTTCTTGACGTTCTC -3'	2739	68 °C
(X_355279)		3'- GAATAAATGAAGCGTCCCAGAGACG -5'
Target B	OI25_7129 hypothetical protein genomic region	5’- GATACGTTGTCTGCGCTGGGCACC -3’	957	72 °C
(Y_528234)		3'- CGTCTTTCTCACGGTGTTTCAGAG -5'
Target C	DNA polymerase genomic region	5'- GAATGTGACCATGGCGGCACCGGTCGCCGACCAC -3'	4655	68 °C
(X_302961)		3'- CCGGGTGCGACATCAGCAAGTGAGTTCATAA -5'
16S	16S rRNA	5'- AGAGTTTGATCMTGGCTCAG -3'	~1,500	50 °C
		3'- TACGGYTACCTTGTTACGACTT -5'
