# Supplementary material for: Genome sequence analysis of Malayan pangolin (Manis javanica) forensic samples reveals the presence of Paraburkholderia fungorum sequences
Source: PeerJ. 2023 Oct 4;11:e16002. doi: 10.7717/peerj.16002 (PMC10559893; doi:10.7717/peerj.16002)
Supplement: Supplemental Information 2 [file peerj-11-16002-s002.xlsx]

## Sheet: Sheet1
No.	Name	Accession ID
1	pangolin P. fungorum	CP028829-CP028832
2	P. fungorum ATCC BAA-463	CP010024-CP010027
3	P. phytofirmans PsJN	CP001052-CP001054
4	P. xenovorans LB400	CP000270-CP000272
5	P. phenoliruptrix BR3459a	CP003863-CP003865
6	P. phymatum STM815	CP001043-CP001046
7	B. mallei ATCC 23344	CP000010-CP000011
8	B. multivorans ATCC 17616	CP000868-CP000871
9	B. cepacia GG4	CP003774-CP003775
10	B. thailandensis MSMB59	CP013407-CP013408
11	B. pseudomallei K96243	CP009538-CP009537
12	B. oklahomensis EO147	CP013357-CP013356
13	B. cenocepacia AU 1054	CP000378-CP000380
14	B. pyrrocinia DSM 10685	CP011503-CP011506
15	B. vietnamiensis LMG 10929	CP009629-CP009632
16	B. ubonensis MSMB22	CP009486-CP009488
17	B. glumae ATCC 33617	CP009432-CP009435
18	B. gladioli ATCC 10248	CP009319-CP009323
