# Supplementary material for: Genome sequence analysis of Malayan pangolin (Manis javanica) forensic samples reveals the presence of Paraburkholderia fungorum sequences
Source: PeerJ. 2023 Oct 4;11:e16002. doi: 10.7717/peerj.16002 (PMC10559893; doi:10.7717/peerj.16002)
Supplement: Supplemental Information 3 — We found 6,635 contigs (total length = 6,818,896 bp) in cerebrum-specific genomic data and 3,533 contigs (total length = 1,109,334 bp) in cerebellum-specific genomic data that have at least 90% identity and 90% coverage compared to the P. fungorum genome ATCC BAA-463. [file peerj-11-16002-s003.xlsx]

## Sheet: Table 2
Threshold	90% identity 90% coverage		97% identity 97% coverage
Tissue-specific genome	Cerebrum	Cerebellum	Cerebrum	Cerebellum
Total contigs in pangolin with bacteria homologs	6730	3533	5890	3004
P. fungorum ATCC BAA-463	6,635 (98.58%)	3,452 (97.70%)	5,890 (100%)	2,984 (99.33%)
# of base pairs	6,818,896 bp	1,109,334 bp	6,324,546 bp	962,651 bp
Other bacterial species	95	81	0	20
